# Supplementary material
Source: MDPI journal article supplement (https://www.mdpi.com/2073-4344/10/8/857)
Supplement: s1 [file s1]

**Visible-light driven photocatalytic degradation of pirimicarb by Pt-doped AgInS<sub>2</sub> nanoparticles**

**Hweiyen Tsai <sup>1,2</sup>, Janah Shaya <sup>3,4</sup>, Siriluck Tesana <sup>5</sup>, Vladimir B. Golovko <sup>5</sup>, Syuan-Yun Wang <sup>1,2</sup>, Yi-Yen Liao <sup>1,2</sup>, Chung-Shin Lu <sup>6,\*</sup>, Chiing-Chang Chen <sup>7,\*\*</sup>**

<sup>1</sup> Department of Medical Applied Chemistry, Chung Shan Medical University, Taichung, Taiwan;  
[annetsai@csmu.edu.tw](mailto:annetsai@csmu.edu.tw)

<sup>2</sup> Department of Medical Education, Chung Shan Medical University Hospital, Taichung, Taiwan

<sup>3</sup> College of Medicine and Health Sciences, Khalifa University, Abu Dhabi, P.O. Box 127788, UAE;  
[shaya.janah@ku.ac.ae](mailto:shaya.janah@ku.ac.ae)

<sup>4</sup> College of Arts and Sciences, Khalifa University, Abu Dhabi, P.O. Box 127788, UAE

<sup>5</sup> The MacDiarmid Institute for Advanced Materials and Nanotechnology, School of Physical and Chemical Sciences, University of Canterbury, Christchurch 8140, New Zealand; [vladimir.golovko@canterbury.ac.nz](mailto:vladimir.golovko@canterbury.ac.nz)

<sup>6</sup> Department of General Education, National Taichung University of Science and Technology, Taichung, Taiwan; [cslu6@nuc.edu.tw](mailto:cslu6@nuc.edu.tw)

<sup>7</sup> Department of Science Education and Application, National Taichung University of Education, Taichung, Taiwan; [ccchen@mail.ntcu.edu.tw](mailto:ccchen@mail.ntcu.edu.tw)

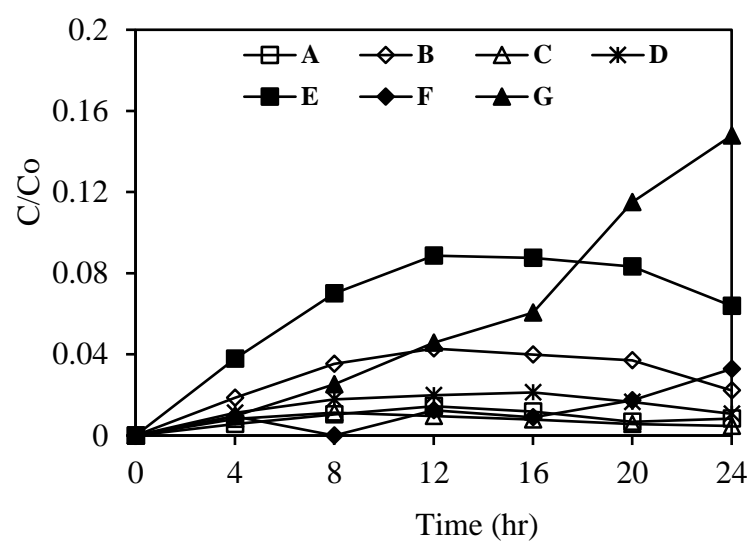

**Figure S1.** Variation in the relative distribution of the intermediate products obtained from the photocatalytic degradation of pirimicarb as a function of irradiation time.
